Development 138, 797 (2011) doi:10.1242/dev.064022

## Macrophages define dermal lymphatic vessel calibre during development by regulating lymphatic endothelial cell proliferation

Emma J. Gordon, Sujata Rao, Jeffrey W. Pollard, Stephen L. Nutt, Richard A. Lang and Natasha L. Harvey

There were some errors published in *Development* **137**, 3899-3910.

On p. 3900 and p. 3904, the references to Dai et al. (2002) were incorrect. The correct reference is Li et al. (2006).

Li, J., Chen, K., Zhu, L. and Pollard, J. W. (2006). Conditional deletion of the colony stimulating factor-1 receptor (c-fms proto-oncogene) in mice. *Genesis* **44**, 328-335.

On p. 3909, 'We thank E. Aranda for the provision of *Csflr*<sup>-/-</sup> embryos.' was omitted from the acknowledgements.

The authors apologise to readers for this mistake.
